# Supplementary material
Source: PubMed Central journal article supplement (PMC4346708)
Supplement: NIHMS652053-supplement-2.pdf [file NIHMS652053-supplement-2.pdf]

Birch EE, Li SL, Jost RM, Morale SE, De La Cruz A, Stager D Jr, Dao L, Stager DR Sr. Binocular iPad treatment for amblyopia in preschool children. J AAPOS online supplement.

e-Supplement 2. Baseline characteristics

| Subject | Condition <sup>a</sup> | Age, years | Sex | Race/ethnicity <sup>b</sup> | Type <sup>c</sup> | Cycloplegic refraction |                   | Tropia, <sup>d</sup> PD | VA, logMAR | Stereoaucuity, arsec | Prior surgery | Prior patching |
|---------|------------------------|------------|-----|-----------------------------|-------------------|------------------------|-------------------|-------------------------|------------|----------------------|---------------|----------------|
|         |                        |            |     |                             |                   | Right eye              | Left eye          |                         |            |                      |               |                |
| 1       | Sham                   | 6.0        | M   | NHW                         | A                 | +3.00                  | +5.00 +0.75 × 90  | 0                       | 0.3        | 100                  | N             | Y              |
| 2       | Sham                   | 6.6        | M   | NHW                         | A                 | +3.50 +0.50 × 75       | +1.00             | 0                       | 0.3        | 800                  | N             | N              |
| 3       | Sham                   | 5.7        | F   | NHW                         | S                 | +2.75 +0.25 × 60       | +2.75 +1.00 × 115 | 0                       | 0.3        | nil                  | Y             | Y              |
| 4       | Sham                   | 5.8        | F   | NHW                         | C                 | +6.00 +0.75 × 70       | +3.00 +0.25 × 110 | ET2                     | 0.4        | 800                  | N             | Y              |
| 5       | Sham                   | 6.6        | F   | HW                          | C                 | +3.00 +1.00 × 80       | +4.00 +1.50 × 100 | E(T)2                   | 0.6        | nil                  | N             | N              |
| 6       | Binocular              | 4.8        | M   | NHW                         | A                 | +3.50 +0.50 × 70       | +4.50 +0.50 × 75  | 0                       | 0.2        | 100                  | N             | N              |
| 7       | Binocular              | 6.3        | M   | NHW                         | A                 | +6.00                  | +5.00             | 0                       | 0.2        | 100                  | N             | Y              |
| 8       | Binocular              | 4.2        | F   | NHW                         | A                 | +2.50 +0.50 × 20       | +1.00             | 0                       | 0.2        | 100                  | N             | Y              |
| 9       | Binocular              | 6.8        | M   | AA                          | A                 | +2.50                  | +1.50             | 0                       | 0.3        | 200                  | N             | Y              |
| 10      | Binocular              | 6.4        | M   | NHW                         | A                 | +2.50                  | +3.75             | 0                       | 0.3        | 1200                 | N             | N              |
| 11      | Binocular              | 5.3        | M   | AS                          | A                 | +0.50 +0.50 × 90       | -4.00             | 0                       | 0.3        | nil                  | N             | Y              |
| 12      | Binocular              | 5.6        | M   | NHW                         | A                 | +6.00 +0.75 × 90       | +7.00 +1.00 × 90  | 0                       | 0.4        | nil                  | N             | Y              |
| 13      | Binocular              | 4.3        | M   | M                           | A                 | Plano                  | +5.00 +2.00 × 90  | 0                       | 0.4        | nil                  | N             | N              |
| 14      | Binocular              | 5.1        | F   | M                           | A                 | Plano                  | +2.25 +1.00 × 5   | 0                       | 0.4        | 100                  | N             | Y              |
| 15      | Binocular              | 6.3        | F   | NHW                         | A                 | +3.50                  | +1.25 +0.25 × 85  | 0                       | 0.6        | 2000                 | N             | N              |
| 16      | Binocular              | 5.9        | M   | NHW                         | A                 | +1.50                  | +3.50             | 0                       | 0.6        | nil                  | N             | Y              |
| 17      | Binocular              | 6.4        | F   | NHW                         | A                 | +6.50 +0.75 × 30       | +2.50 +0.25 × 140 | 0                       | 0.7        | nil                  | N             | N              |
| 18      | Binocular              | 5.5        | M   | NHW                         | A                 | +2.00                  | +6.00 +1.50 × 90  | 0                       | 0.9        | nil                  | N             | N              |
| 19      | Binocular              | 6.9        | M   | NHW                         | A                 | +0.25 +0.25 × 145      | +5.75 +1.25 × 15  | 0                       | 1.0        | nil                  | N             | N              |
| 20      | Binocular              | 5.9        | F   | NHW                         | S                 | +2.25                  | +2.50             | 0                       | 0.2        | nil                  | N             | Y              |
| 21      | Binocular              | 5.3        | M   | NHW                         | S                 | +6.50 +1.00 × 105      | +6.50 +1.50 × 75  | 0                       | 0.3        | nil                  | Y             | Y              |
| 22      | Binocular              | 6.8        | F   | NHW                         | S                 | +1.50                  | +1.50             | 0                       | 0.3        | nil                  | Y             | Y              |
| 23      | Binocular              | 4.9        | F   | NHW                         | S                 | +1.50 +0.50 × 80       | +1.25 +0.50 × 75  | 0                       | 0.4        | nil                  | Y             | N              |
| 24      | Binocular              | 6.3        | F   | NHW                         | S                 | +1.25 +1.25 × 75       | +1.50 +1.25 × 80  | 0                       | 0.4        | nil                  | N             | Y              |
| 25      | Binocular              | 5.2        | F   | NHW                         | S                 | +4.75 +1.50 × 110      | +4.50 +1.25 × 90  | 0                       | 0.4        | nil                  | N             | Y              |
| 26      | Binocular              | 5.7        | F   | M                           | S                 | +1.50                  | +1.50             | 0                       | 0.5        | nil                  | N             | Y              |
| 27      | Binocular              | 5.6        | M   | NHW                         | S                 | +3.00 +0.50 × 95       | +3.00 +0.50 × 85  | 0                       | 0.5        | nil                  | Y             | Y              |
| 28      | Binocular              | 6.4        | M   | NHW                         | S                 | +1.00 +0.50 × 80       | +1.75 +0.75 × 80  | 0                       | 0.5        | nil                  | Y             | Y              |
| 29      | Binocular              | 5.4        | M   | NHW                         | S                 | +8.25 +2.75 × 90       | +8.50 +3.00 × 80  | 0                       | 0.5        | nil                  | N             | Y              |
| 30      | Binocular              | 4.2        | F   | AA                          | C                 | +2.00                  | +5.50             | 0                       | 0.2        | nil                  | N             | Y              |
| 31      | Binocular              | 5.7        | M   | NHW                         | C                 | +2.50                  | +1.50             | ET5 HT2                 | 0.2        | nil                  | Y             | Y              |
| 32      | Binocular              | 6.2        | F   | NHW                         | C                 | +5.00                  | +6.00             | 0                       | 0.2        | nil                  | Y             | Y              |
| 33      | Binocular              | 6.8        | F   | NHW                         | C                 | +5.50 +0.75 × 5        | +7.25 +0.75 × 70  | 0                       | 0.2        | 200                  | N             | Y              |
| 34      | Binocular              | 4.8        | M   | NHW                         | C                 | +5.25 +0.50 × 90       | +3.75             | 0                       | 0.3        | 800                  | N             | Y              |

Birch EE, Li SL, Jost RM, Morale SE, De La Cruz A, Stager D Jr, Dao L, Stager DR Sr. Binocular iPad treatment for amblyopia in preschool children. J AAPOS online supplement.

|    |           |     |   |     |   |                   |                   |       |     |     |   |   |
|----|-----------|-----|---|-----|---|-------------------|-------------------|-------|-----|-----|---|---|
| 35 | Binocular | 6.3 | M | NHW | C | +0.25 +2.50 × 120 | +1.00 +0.50 × 75  | 0     | 0.3 | nil | N | N |
| 36 | Binocular | 4.8 | F | NHW | C | +3.25 +0.75 × 95  | +4.75 +0.50 × 105 | 0     | 0.4 | nil | N | N |
| 37 | Binocular | 5.7 | F | NHW | C | +3.25             | +0.75             | 0     | 0.4 | nil | Y | Y |
| 38 | Binocular | 5.0 | M | M   | C | +2.50 +0.25 × 100 | +1.25 +1.75 × 90  | 0     | 0.4 | nil | N | Y |
| 39 | Binocular | 3.8 | M | NHW | C | +1.00             | +1.00 +2.25 × 80  | 0     | 0.4 | nil | N | Y |
| 40 | Binocular | 6.7 | F | NHW | C | +5.00 +0.75 × 70  | +2.00             | 0     | 0.4 | 800 | N | Y |
| 41 | Binocular | 4.3 | M | NHW | C | +6.00             | +5.00             | 0     | 0.4 | nil | N | Y |
| 42 | Binocular | 4.0 | F | HW  | C | +4.50 +0.50 × 85  | +2.50             | X(T)4 | 0.4 | nil | Y | Y |
| 43 | Binocular | 5.9 | M | AS  | C | +5.00             | +6.50             | 0     | 0.5 | nil | N | Y |
| 44 | Binocular | 6.6 | M | NHW | C | +2.50             | +4.00             | 0     | 0.5 | nil | N | Y |
| 45 | Binocular | 5.2 | M | NHW | C | +5.50 +0.50 × 95  | +3.50 +1.00 × 95  | ET2   | 0.5 | nil | Y | Y |
| 46 | Binocular | 6.7 | M | NHW | C | +1.00             | +2.25             | 0     | 0.5 | nil | Y | Y |
| 47 | Binocular | 4.0 | F | NHW | C | +5.50 +2.75 × 105 | +6.75 +3.00 × 65  | E(T)4 | 0.6 | nil | Y | Y |
| 48 | Binocular | 4.3 | F | M   | C | +4.25 +1.75 × 90  | +3.25 +0.75 × 90  | 0     | 0.6 | nil | N | Y |
| 49 | Binocular | 5.9 | M | NHW | C | +3.50             | +5.00             | 0     | 0.7 | nil | N | Y |
| 50 | Binocular | 4.5 | F | NHW | C | +2.75             | +4.50 +0.50 × 90  | 0     | 0.8 | nil | N | Y |

*PD*, prism diopters; *E(T)*, intermittent esotropia; *X(T)*, intermittent exotropia.

<sup>a</sup> Sham group = high contrast game elements presented to the fellow eye and low contrast elements presented to the amblyopic eye; Binocular = low contrast game elements presented to the fellow eye and high contrast elements presented to the amblyopic eye.

<sup>c</sup> AA = African American; AS = Asian; HW = Hispanic white; M = more than one race; NHW = non-Hispanic white.

<sup>d</sup> A = anisometropic amblyopia; S = strabismic amblyopia; C = combined mechanism amblyopia

<sup>e</sup> Tropia measured during simultaneous prism and cover test with habitual optical correction
